# Supplementary material
Source: PubMed Central journal article supplement (PMC6125559)
Supplement: zac009187435s1.pdf [file zac009187435s1.pdf]

## Supplementary Appendix

Supplementary Table 1: Viable plating results for selected two-antibiotic combinations against 42 CR-GNB

| Antibiotic combinations                        | No. of inhibitory combinations (%) based on viable plating |                     |                      |                      |
|------------------------------------------------|------------------------------------------------------------|---------------------|----------------------|----------------------|
|                                                | All CR-GNB                                                 | <i>A. baumannii</i> | <i>P. aeruginosa</i> | <i>K. pneumoniae</i> |
|                                                | (n = 42)                                                   | (n = 14)            | (n = 14)             | (n = 14)             |
| <b>Polymyxin B-containing combinations</b>     |                                                            |                     |                      |                      |
| Polymyxin B + amikacin                         | 34 (81.0)                                                  | 11 (78.6)           | 13 (92.9)            | 10 (71.4)            |
| Polymyxin B + cefepime                         | 31 (73.8)                                                  | 13 (92.9)           | 10 (71.4)            | 8 (57.1)             |
| Polymyxin B + meropenem                        | 27 (64.3)                                                  | 9 (64.3)            | 8 (57.1)             | 10 (71.4)            |
| Polymyxin B + rifampicin                       | 34 (81.0)                                                  | 13 (92.9)           | 8 (57.1)             | 13 (92.9)            |
| Polymyxin B + tigecycline                      | 32 (76.2)                                                  | 12 (85.7)           | 6 (42.9)             | 14 (100)             |
| <b>Non-polymyxin B-containing combinations</b> |                                                            |                     |                      |                      |
| Amikacin + meropenem                           | 19 (45.3)                                                  | 1 (7.1)             | 11 (78.6)            | 7 (50.0)             |
| Amikacin + levofloxacin                        | 21 (50.0)                                                  | 3 (21.4)            | 11 (78.6)            | 7 (50.0)             |
| Amikacin + tigecycline                         | 28 (66.7)                                                  | 7 (50.0)            | 9 (64.3)             | 12 (85.7)            |
| Cefepime + meropenem                           | 20 (47.6)                                                  | 6 (42.8)            | 9 (64.3)             | 5 (35.7)             |
| Meropenem + tigecycline                        | 29 (69.0)                                                  | 11 (78.6)           | 6 (42.8)             | 12 (85.7)            |

Supplementary Table 2: No. of inhibitory/non-inhibitory combinations based on viable count and sensitivity, specificity and unweighted accuracy of  $T_{RLU}$  to discriminate between inhibitory/non-inhibitory combinations at 6h and 24h against 14 CR *A. baumannii*

| Observations against <i>A. baumannii</i>                                                                     | No. of inhibitory/non-inhibitory specimens based on viable count (%)    |                | Area under ROC | $T_{RLU}$ | Accuracy of the ATP bioluminescence assay (%) |             |                     | Comparison of 6h and 24h AUROC curves |
|--------------------------------------------------------------------------------------------------------------|-------------------------------------------------------------------------|----------------|----------------|-----------|-----------------------------------------------|-------------|---------------------|---------------------------------------|
|                                                                                                              | Inhibitory                                                              | Non-inhibitory |                |           | Sensitivity                                   | Specificity | Unweighted accuracy | p-value                               |
|                                                                                                              | <b>All antibiotics (no. of antibiotic-isolate observations = 1,036)</b> |                |                |           |                                               |             |                     |                                       |
| 6h ATP bioluminescence                                                                                       | 522 (50.4)                                                              | 514 (49.6)     | 0.78           | -1.03     | 76.2                                          | 71.2        | 73.7                | <0.01                                 |
| 24h ATP bioluminescence                                                                                      |                                                                         |                | 0.69           | -0.20     | 51.2                                          | 76.3        | 63.8                |                                       |
| <b>All carbapenem-containing two-antibiotic combinations (no. of antibiotic-isolate observations = 378)</b>  |                                                                         |                |                |           |                                               |             |                     |                                       |
| 6h ATP bioluminescence                                                                                       | 176 (46.6)                                                              | 202 (53.4)     | 0.78           | -0.98     | 82.0                                          | 66.9        | 74.5                | 0.01                                  |
| 24h ATP bioluminescence                                                                                      |                                                                         |                | 0.70           | -0.28     | 55.6                                          | 79.8        | 67.7                |                                       |
| <b>All polymyxin B-containing two-antibiotic combinations (no. of antibiotic-isolate observations = 154)</b> |                                                                         |                |                |           |                                               |             |                     |                                       |
| 6h ATP bioluminescence                                                                                       | 114 (74.0)                                                              | 40 (26.0)      | 0.65           | -1.01     | 86.7                                          | 54.2        | 70.5                | 0.23                                  |
| 24h ATP bioluminescence                                                                                      |                                                                         |                | 0.58           | -0.31     | 69.2                                          | 60.4        | 64.8                |                                       |
| <b>All amikacin-containing two-antibiotic combinations (no. of antibiotic-isolate observations = 154)</b>    |                                                                         |                |                |           |                                               |             |                     |                                       |
| 6h ATP bioluminescence                                                                                       | 64 (41.6)                                                               | 90 (58.4)      | 0.75           | -1.27     | 68.8                                          | 69.2        | 69.0                | 0.25                                  |
| 24h ATP bioluminescence                                                                                      |                                                                         |                | 0.80           | -0.20     | 67.2                                          | 85.6        | 76.4                |                                       |

Supplementary Table 3: No. of inhibitory/non-inhibitory combinations based on viable count and sensitivity, specificity and unweighted accuracy of  $T_{RLU}$  to discriminate between inhibitory/non-inhibitory combinations at 6h and 24h against 14 CR *P. aeruginosa*

| Observations against <i>P. aeruginosa</i>                                                                    | No. of inhibitory/non-inhibitory specimens based on viable count (%)    |                | Area under ROC | $T_{RLU}$ | Accuracy of the ATP bioluminescence assay (%) |             |                     | Comparison of 6h and 24h AUROC curves |
|--------------------------------------------------------------------------------------------------------------|-------------------------------------------------------------------------|----------------|----------------|-----------|-----------------------------------------------|-------------|---------------------|---------------------------------------|
|                                                                                                              | Inhibitory                                                              | Non-inhibitory |                |           | Sensitivity                                   | Specificity | Unweighted accuracy | p-value                               |
|                                                                                                              | <b>All antibiotics (no. of antibiotic-isolate observations = 1,036)</b> |                |                |           |                                               |             |                     |                                       |
| 6h ATP bioluminescence                                                                                       | 477 (46.0)                                                              | 559 (54.0)     | 0.84           | -1.26     | 86.2                                          | 73.5        | 79.9                | <0.01                                 |
| 24h ATP bioluminescence                                                                                      |                                                                         |                | 0.71           | -0.36     | 66.7                                          | 71.7        | 69.2                |                                       |
| <b>All carbapenem-containing two-antibiotic combinations (no. of antibiotic-isolate observations = 378)</b>  |                                                                         |                |                |           |                                               |             |                     |                                       |
| 6h ATP bioluminescence                                                                                       | 190 (50.3)                                                              | 188 (49.7)     | 0.88           | -0.81     | 96.5                                          | 75.3        | 85.9                | <0.01                                 |
| 24h ATP bioluminescence                                                                                      |                                                                         |                | 0.72           | -0.22     | 70.2                                          | 77.2        | 73.7                |                                       |
| <b>All polymyxin B-containing two-antibiotic combinations (no. of antibiotic-isolate observations = 154)</b> |                                                                         |                |                |           |                                               |             |                     |                                       |
| 6h ATP bioluminescence                                                                                       | 94 (61.0)                                                               | 60 (39.0)      | 0.62           | -2.73     | 72.7                                          | 46.4        | 60.0                | <0.01                                 |
| 24h ATP bioluminescence                                                                                      |                                                                         |                | 0.46           | -0.68     | 54.6                                          | 55.1        | 54.9                |                                       |
| <b>All amikacin-containing two-antibiotic combinations (no. of antibiotic-isolate observations = 154)</b>    |                                                                         |                |                |           |                                               |             |                     |                                       |
| 6h ATP bioluminescence                                                                                       | 134 (87.0)                                                              | 20 (13.0)      | 0.94           | -1.91     | 92.1                                          | 87.0        | 90.0                | 0.07                                  |
| 24h ATP bioluminescence                                                                                      |                                                                         |                | 0.87           | -0.1      | 94.5                                          | 69.6        | 82.1                |                                       |

Supplementary Table 4: No. of inhibitory/non-inhibitory combinations based on viable count and sensitivity, specificity and unweighted accuracy of T<sub>RLU</sub> to discriminate between inhibitory/non-inhibitory combinations at 6h and 24h against 14 CR *K. pneumoniae*

| Observations against <i>K. pneumoniae</i>                                                                    | No. of inhibitory/non-inhibitory specimens based on viable count (%)    |                | Area under ROC | T <sub>RLU</sub> | Accuracy of the ATP bioluminescence assay (%) |             |                     | Comparison of 6h and 24h AUROC curves |
|--------------------------------------------------------------------------------------------------------------|-------------------------------------------------------------------------|----------------|----------------|------------------|-----------------------------------------------|-------------|---------------------|---------------------------------------|
|                                                                                                              | Inhibitory                                                              | Non-inhibitory |                |                  | Sensitivity                                   | Specificity | Unweighted accuracy | p-value                               |
|                                                                                                              | <b>All antibiotics (no. of antibiotic-isolate observations = 1,036)</b> |                |                |                  |                                               |             |                     |                                       |
| 6h ATP bioluminescence                                                                                       | 479 (46.2)                                                              | 557 (55.7)     | 0.89           | -1.43            | 85.8                                          | 79.5        | 82.7                | <0.01                                 |
| 24h ATP bioluminescence                                                                                      |                                                                         |                | 0.81           | -0.72            | 86.0                                          | 78.6        | 82.3                |                                       |
| <b>All carbapenem-containing two-antibiotic combinations (no. of antibiotic-isolate observations = 378)</b>  |                                                                         |                |                |                  |                                               |             |                     |                                       |
| 6h ATP bioluminescence                                                                                       | 189 (50.0)                                                              | 189 (50.0)     | 0.90           | -1.94            | 78.3                                          | 87.1        | 82.7                | <0.01                                 |
| 24h ATP bioluminescence                                                                                      |                                                                         |                | 0.75           | -0.76            | 89.2                                          | 65.9        | 77.6                |                                       |
| <b>All polymyxin B-containing two-antibiotic combinations (no. of antibiotic-isolate observations = 154)</b> |                                                                         |                |                |                  |                                               |             |                     |                                       |
| 6h ATP bioluminescence                                                                                       | 110 (71.4)                                                              | 44 (28.6)      | 0.81           | -1.15            | 81.2                                          | 80.4        | 80.8                | 0.51                                  |
| 24h ATP bioluminescence                                                                                      |                                                                         |                | 0.78           | -0.74            | 88.0                                          | 66.7        | 77.4                |                                       |
| <b>All amikacin-containing two-antibiotic combinations (no. of antibiotic-isolate observations = 154)</b>    |                                                                         |                |                |                  |                                               |             |                     |                                       |
| 6h ATP bioluminescence                                                                                       | 89 (57.8)                                                               | 65 (42.2)      | 0.90           | -1.86            | 82.3                                          | 90.3        | 86.3                | 0.02                                  |
| 24h ATP bioluminescence                                                                                      |                                                                         |                | 0.83           | -0.23            | 80.2                                          | 86.1        | 83.2                |                                       |
